# Supplementary material for: Bcl-3 regulates TGFβ signaling by stabilizing Smad3 during breast cancer pulmonary metastasis
Source: PubMed Central journal article supplement (PMC5261001; doi:10.1038/cddis.2016.405), 2016-12-01

# Supplementary Figure 1 Bcl-3 knockdown strategy

**a**

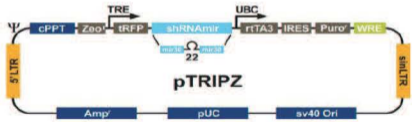

Tet-on inducible shRNA expression

**b**

shRNA1

GAGCT CGAACCAGACTAAAGAAAACATTATCACTTCGGTGTCTACATGAGCTTTTCTTAGCTTACTTCTTAA G

shRNA2

GAGCT CCGGCCCTCGAGCTGTAGATGTTATCACTTCGGTGTCTACATGAGCTTACTAGACTTCTAGGCCCTTAA G

**c**

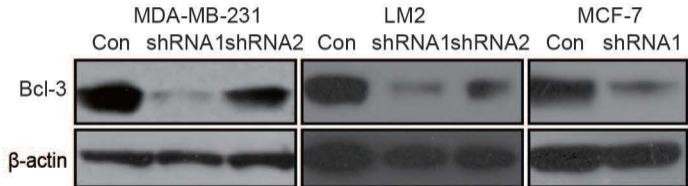

# Supplementary Figure 2 Tumor volume of WT and Bcl-3 knockout MMTV-PyMT mice

**a**

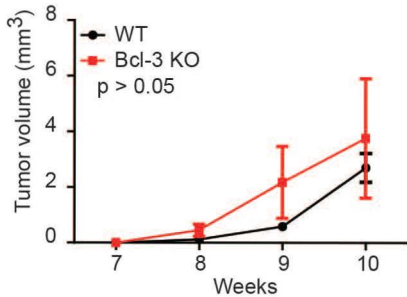

**b**

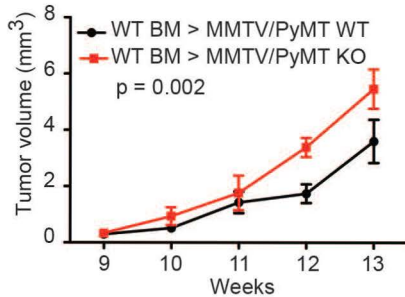

Supplementary Figure 3 Bcl-3 regulates TGF $\beta$  signaling by stabilizing Smad3 protein

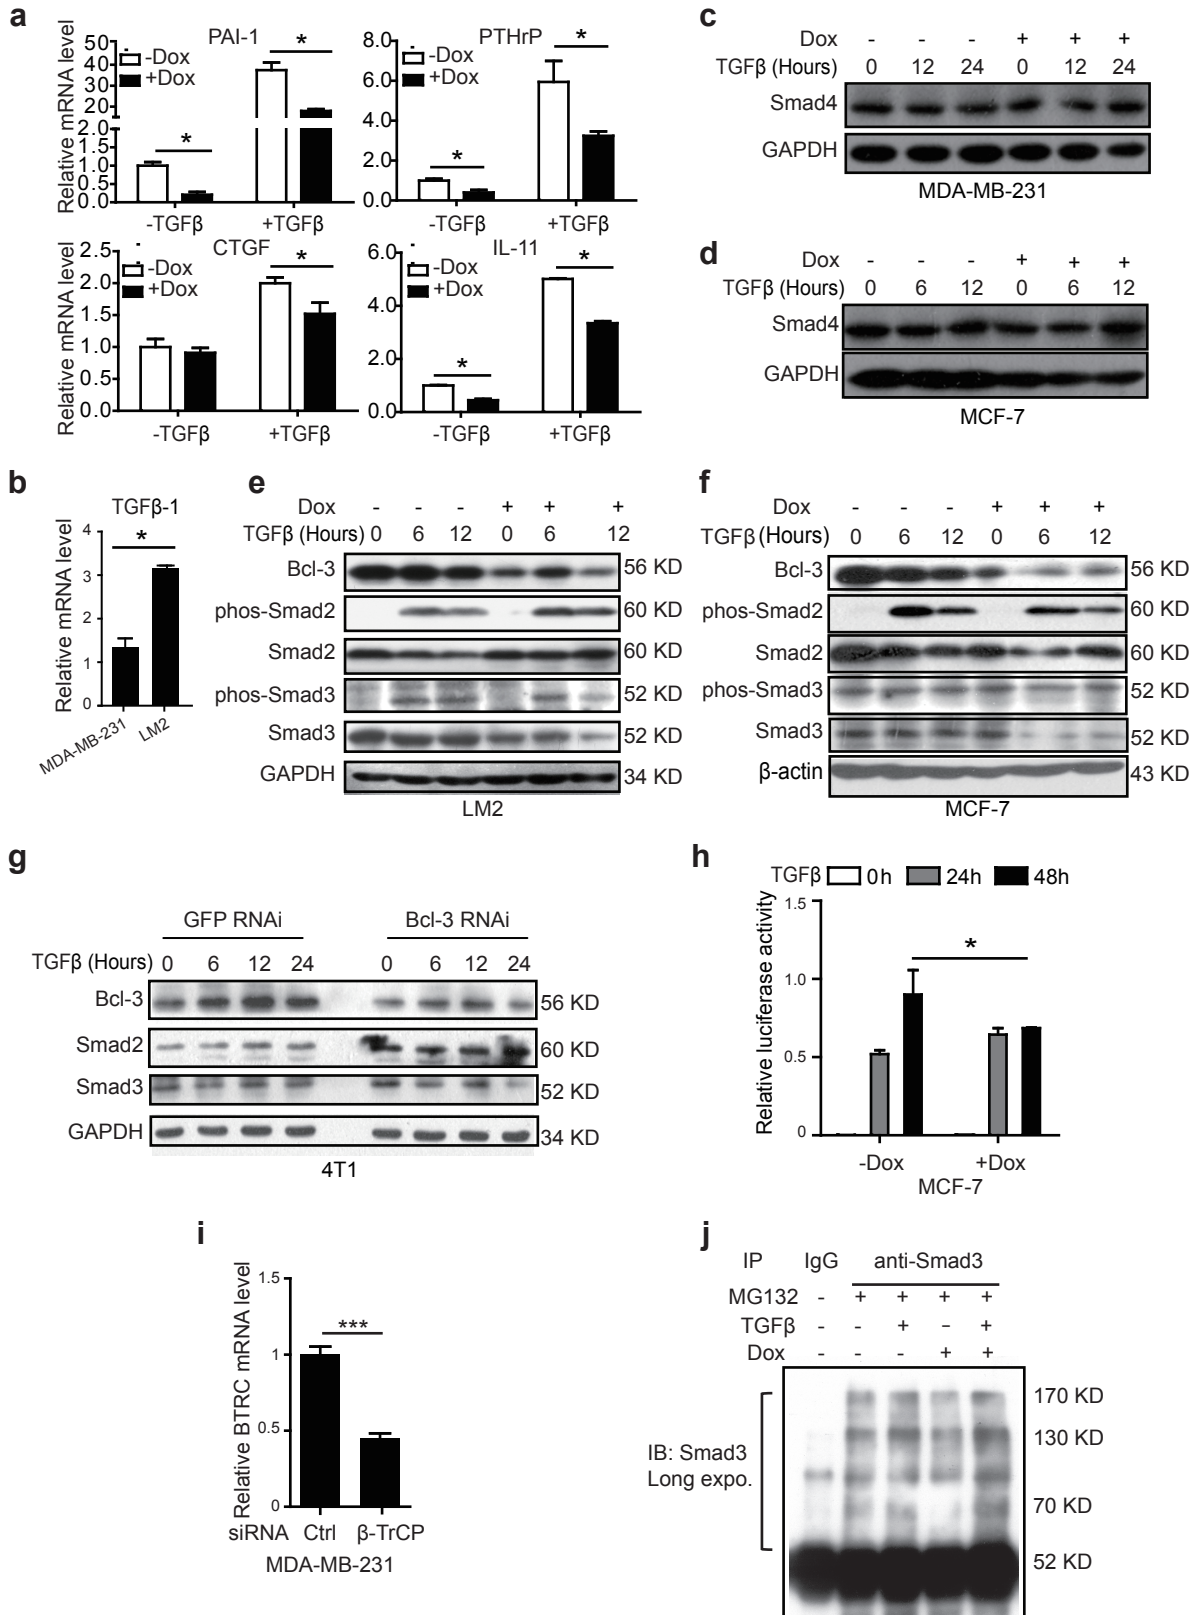

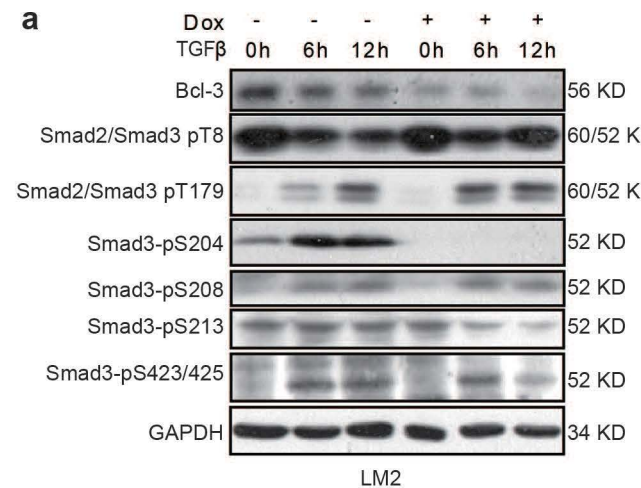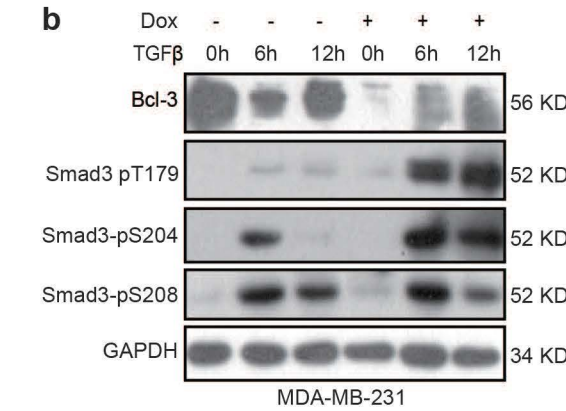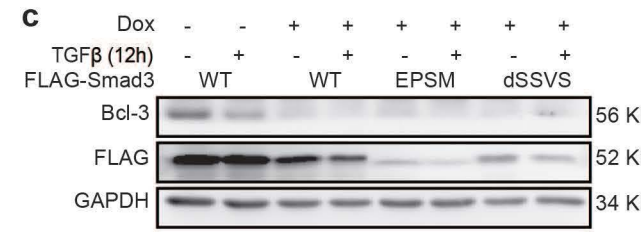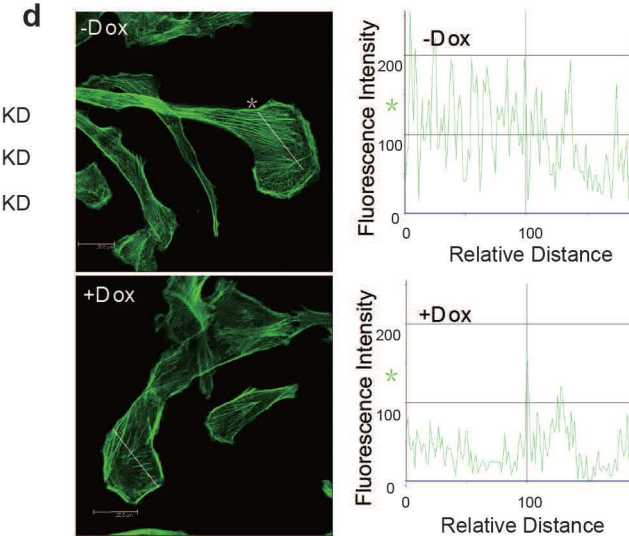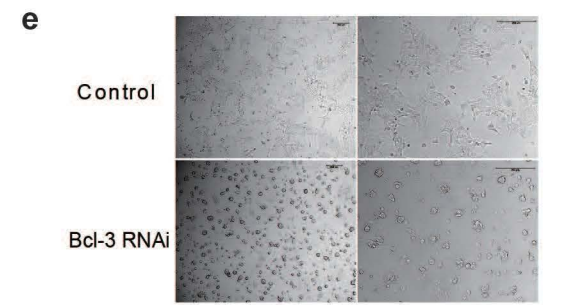

# Supplementary Figure 5

Cellular localization of Bcl-3 and Smad3 in TGF $\beta$  treated or untreated MDA-MB-231 cells

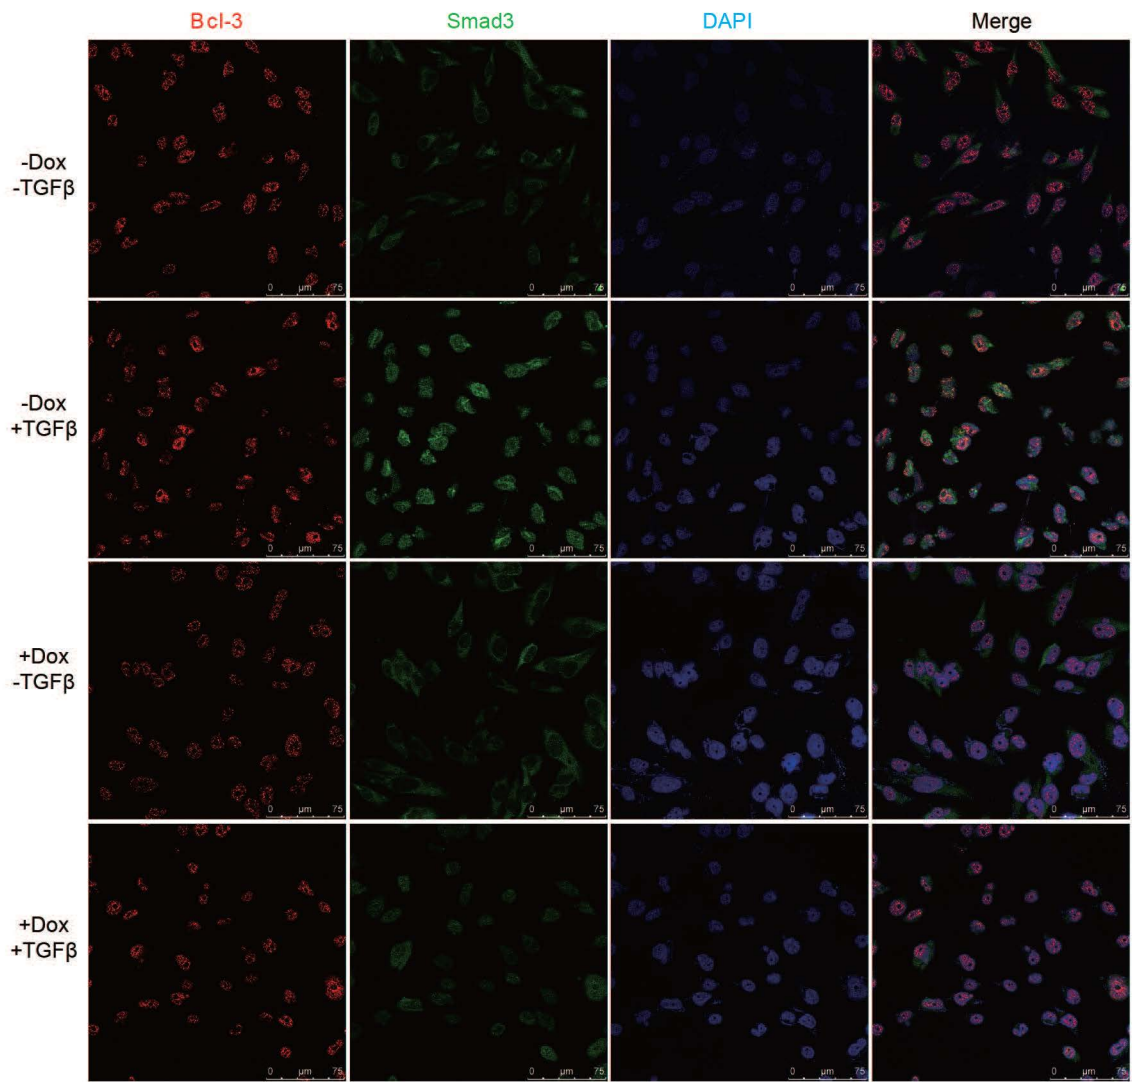

a

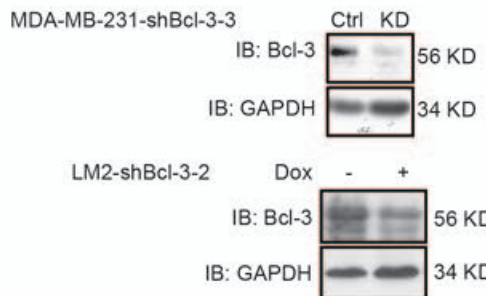

b

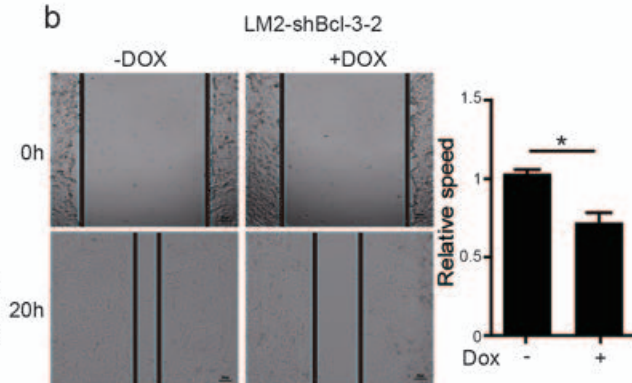

c

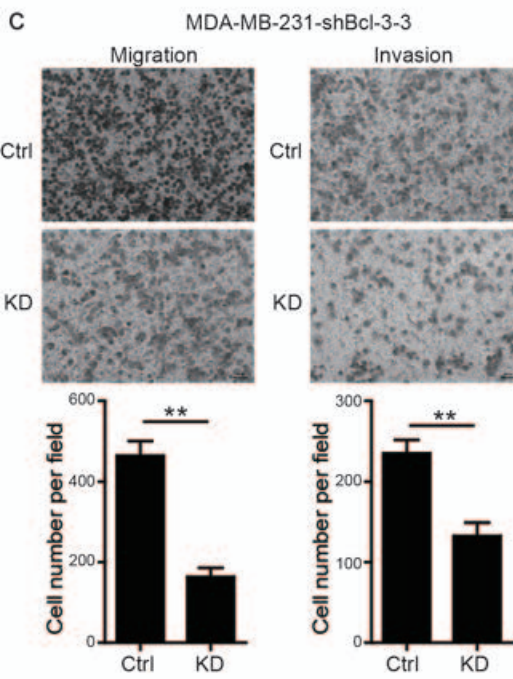

d

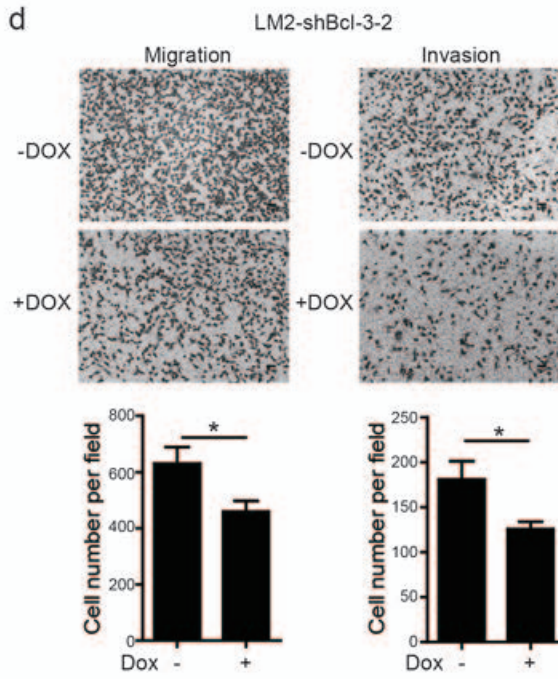

Supplement: cddis2016405x3.pdf [file cddis2016405x3.pdf]
